# Supplementary material
Source: Copernicus journal article supplement (doi:10.5194/egusphere-2026-2776)
Supplement: Supplementary file 1 [file egusphere-2026-2776-supplement.pdf]

*Supplement of*

**Sensitivity of dynamic aging on the climate effects of black carbon aerosols over East Asia in summer**

**Peng Gao et al.**

*Correspondence to:* Bingliang Zhuang ([blzhaung@nju.edu.cn](mailto:blzhaung@nju.edu.cn))

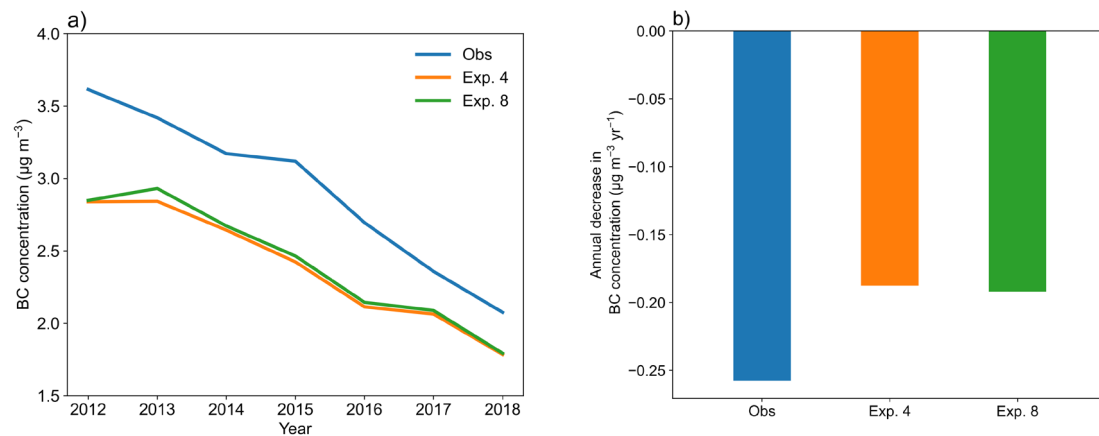

**Figure S1. Time series of the annual mean BC surface concentration (a) from observations and model simulations in the Exps. 4 and 8 over 33 CBNET sites and their annual decreasing trend (b) during 2012–2018. Detailed information about the observations can be found in (Shen et al., 2023).**

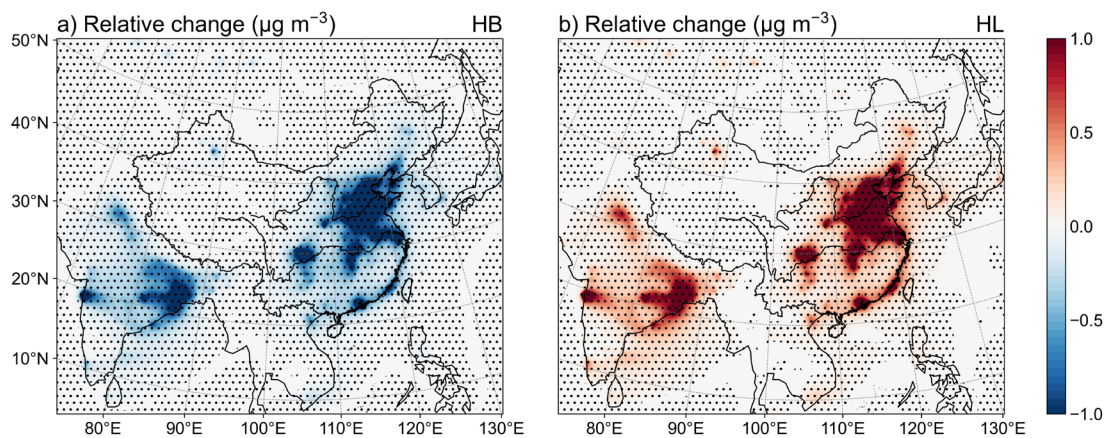

**Figure S2. Relative changes in the surface concentration of hydrophobic BC (HB) and hydrophilic BC (HL) (a and b,  $\mu\text{g m}^{-3}$ ) over East Asia in summer during 2008–2020 between the Exp. 8 and Exp. 4.**

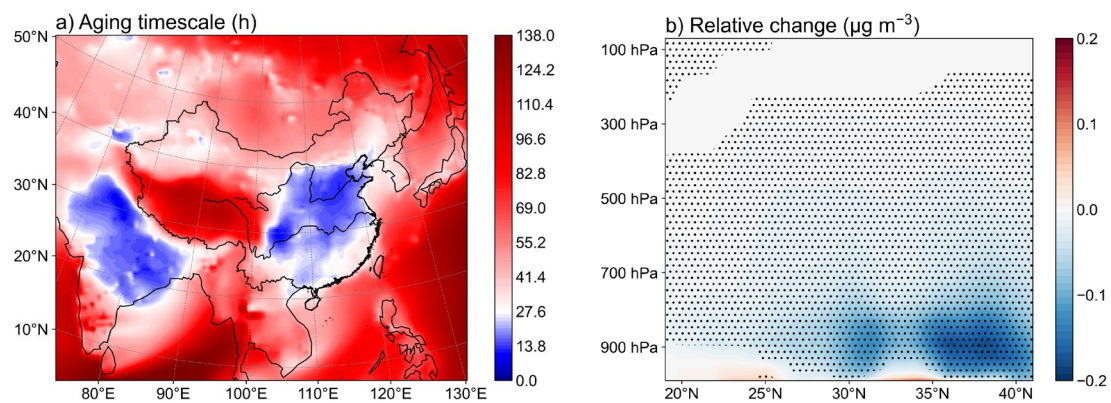

**Figure S3. Spatial distribution of the BC aging timescale (b, h) averaged from the surface to 850 hPa over East Asia in summer during 2008–2020. Relative changes in the BC concentration (b,  $\mu\text{g m}^{-3}$ ) in the altitude-latitude section averaged from 112° to 122°E over East Asia in summer during 2008–2020 between the Exp. 8 and Exp. 4. Black-dotted regions denote statistically significant differences at the 90% confidence level based on a Student's *t*-test.**

| Site ID | Lon.  | Lat.  | Station name | Land surface | Obs. BC ( $\mu\text{g m}^{-3}$ ) | Exp. 4 ( $\mu\text{g m}^{-3}$ ) | Exp. 8 ( $\mu\text{g m}^{-3}$ ) |
|---------|-------|-------|--------------|--------------|----------------------------------|---------------------------------|---------------------------------|
| 51058   | 88    | 47.1  | Akdala       | Baseline     | 0.29                             | 0.12                            | 0.11                            |
| 51462   | 87.56 | 43.86 | Urumqi       | Urban        | 2.14                             | 1.67                            | 1.72                            |
| 51747   | 83.7  | 39    | Tazhong      | Remote       | 1.09                             | 0.11                            | 0.12                            |
| 52203   | 93.5  | 42.8  | Hami         | Rural        | 2.47                             | 0.33                            | 0.32                            |
| 52418   | 94.7  | 40.2  | Dunhuang     | Urban        | 3.61                             | 0.10                            | 0.10                            |
| 52859   | 101   | 36.3  | Waliguan     | Baseline     | 0.30                             | 0.16                            | 0.15                            |
| 53276   | 112.9 | 42.4  | Zhurihe      | Urban        | 0.58                             | 0.21                            | 0.20                            |
| 53787   | 113   | 37.1  | Yushe        | Urban        | 2.29                             | 3.23                            | 3.29                            |
| 54084   | 127.6 | 44.7  | Longfengshan | Baseline     | 1.88                             | 1.64                            | 1.57                            |
| 54102   | 116.1 | 44    | Xilinhaote   | Remote       | 0.31                             | 0.14                            | 0.12                            |
| 54135   | 122.3 | 43.6  | Tongliao     | Urban        | 3.08                             | 1.05                            | 1.04                            |
| 54339   | 122.6 | 41.1  | Anshan       | Urban        | 2.98                             | 4.41                            | 4.45                            |
| 54342   | 123.3 | 41.4  | Shenyang     | Urban        | 7.90                             | 3.38                            | 3.38                            |
| 54346   | 123.5 | 41.2  | Benxi        | Urban        | 6.60                             | 3.30                            | 3.31                            |
| 54351   | 124   | 41.9  | Fushun       | Urban        | 4.25                             | 3.36                            | 3.31                            |
| 54421   | 117.1 | 40.7  | Shangdianzi  | Baseline     | 2.02                             | 0.90                            | 0.89                            |
| 54511   | 116.5 | 39.8  | Guanxiangtai | Urban        | 5.43                             | 6.39                            | 6.39                            |
| 54662   | 121.6 | 38.9  | Dalian       | Urban        | 2.47                             | 3.02                            | 3.14                            |
| 54725   | 117.5 | 37.5  | Huimin       | Urban        | 1.83                             | 4.93                            | 5.15                            |
| 55591   | 91.1  | 29.7  | Lasa         | Urban        | 2.52                             | 0.18                            | 0.17                            |
| 56294   | 104   | 30.7  | Chengdu      | Urban        | 8.27                             | 5.61                            | 5.49                            |
| 56449   | 99.7  | 28    | Shangri-La   | Baseline     | 0.22                             | 0.15                            | 0.13                            |
| 57083   | 113.7 | 34.8  | Zhengzhou    | Urban        | 7.60                             | 6.41                            | 6.61                            |
| 57131   | 109   | 34.4  | Xi'an        | Rural        | 5.73                             | 4.46                            | 4.50                            |
| 57957   | 110.3 | 25.3  | Guilin       | Urban        | 2.91                             | 1.63                            | 1.61                            |
| 58363   | 122   | 31.5  | Dongtan      | Rural        | 1.64                             | 1.96                            | 2.09                            |
| 58448   | 119.7 | 30.3  | Lin'an       | Baseline     | 2.95                             | 2.26                            | 2.33                            |
| 58506   | 116   | 29.6  | Lushan       | Rural        | 0.99                             | 3.70                            | 3.84                            |

|       |       |      |            |       |      |      |      |
|-------|-------|------|------------|-------|------|------|------|
| 59431 | 108.5 | 22.8 | Nanning    | Urban | 3.26 | 2.59 | 2.63 |
| 59481 | 113.4 | 23   | Panyu      | Rural | 4.12 | 3.71 | 3.83 |
| 59493 | 114   | 22.5 | Shenzhen   | Urban | 2.19 | 3.03 | 3.15 |
| W3467 | 103.8 | 36   | Gaolanshan | Rural | 1.30 | 0.87 | 0.87 |
| Z9736 | 111.7 | 29.2 | Changde    | Rural | 2.39 | 3.76 | 3.85 |

**Table S1. The statistics of observed and simulated BC surface concentration averaged over 2012–2018 at 33 stations. The observation data are derived from Shen et al. (2023).**

## Reference

Shen, W., Wang, M., Liu, Y., Dong, X., Zhao, D., Yue, M., Tian, P., and Ding, D.: Evaluating BC Aging Processes in the Community Atmosphere Model Version 6 (CAM6), *J. Geophys. Res.: Atmos.*, 128, <https://doi.org/10.1029/2022jd037427>, 2023.
